# Supplementary material
Source: publisher figshare collection journal article supplement (https://acs.figshare.com/ndownloader/files/4663267)
Supplement: Supplementary file 1 [file 4663267]

# **Proton Conducting Films of Nanoscale Ribbons Formed by Exfoliation of the Layer Perovskite $\text{H}_2\text{SrTa}_2\text{O}_7$**

*Joshua A. Schottenfeld,<sup>1</sup> Yoji Kobayashi,<sup>1</sup> Jinguo Wang,<sup>3</sup>*

*Digby D. Macdonald,<sup>2</sup> and Thomas E. Mallouk<sup>1\*</sup>*

Department of Chemistry,<sup>1</sup> Department of Materials Science and Engineering,<sup>2</sup> and Materials Research  
Laboratory,<sup>3</sup> The Pennsylvania State University, University Park, PA 16802

## **Supporting Information (4 pp.)**

Fig. S-1. TGA of hydrated  $\text{H}_2\text{SrTa}_2\text{O}_7$ .

Fig. S-2. AFM image of ribbons deposited by layer-by-layer adsorption.

Fig. S-3. TGA-MS of flocculated ribbons and PDDA.

Fig. S-4. Schematic drawing of electrode geometry used for thin film EIS measurements.

Fig. S-5. AFM image of ribbons in the gap between platinum electrodes, in a ribbon/PDDA film grown layer-by-layer.

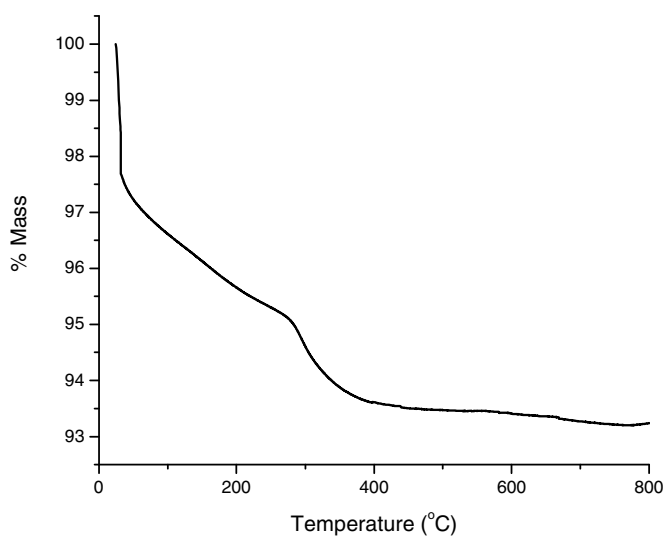

**Figure S-1.** TGA of hydrated  $\text{H}_2\text{SrTa}_2\text{O}_7$

---

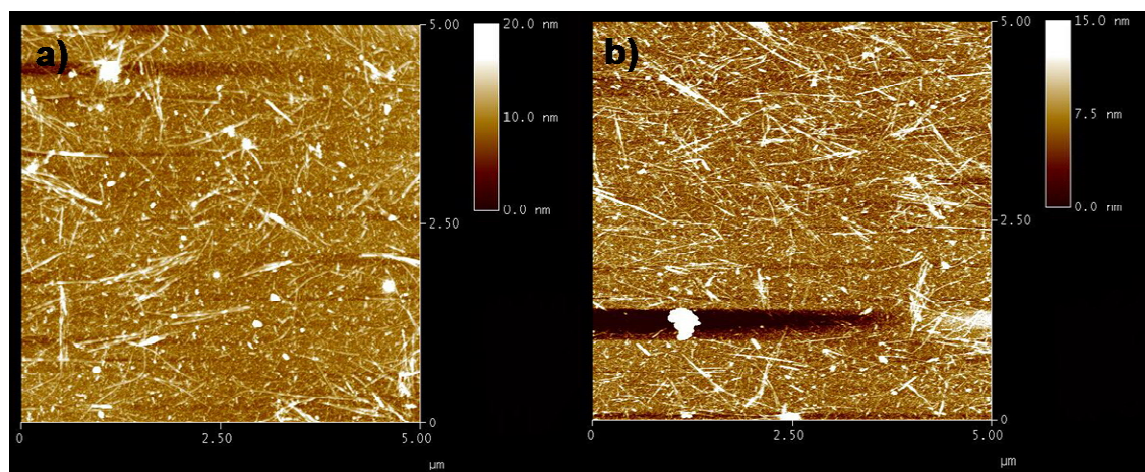

**Figure S-2.** AFM image of ribbons deposited by layer-by-layer adsorption after a) one and b) two cycles of film growth.

---

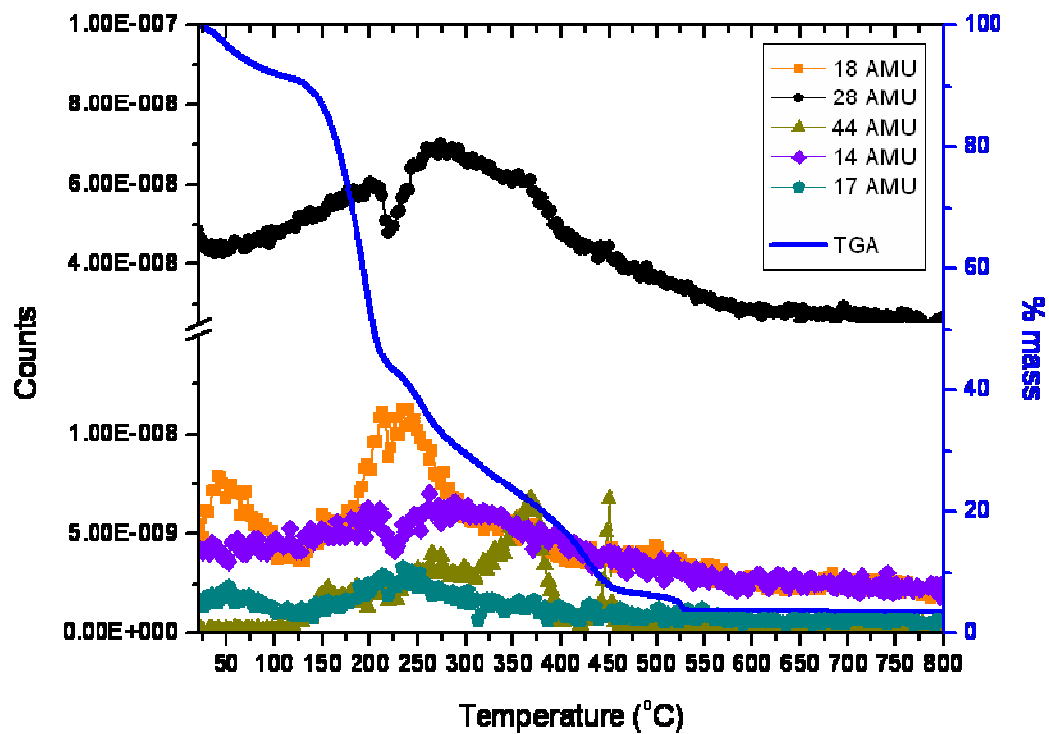

**Figure S-3.** TGA-MS of flocculated ribbons and PDDA.

---

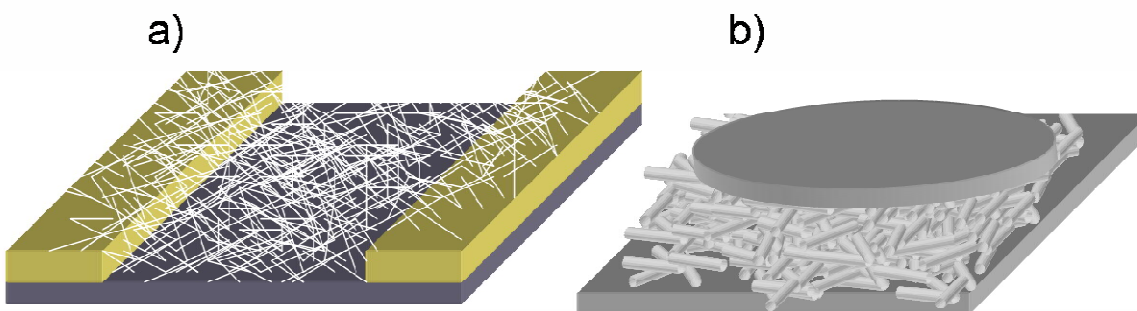

**Figure S-4.** Schematic drawing of electrode geometry used for thin film EIS measurements; a) electrode used to measure conductivity in the plane of the film and b) electrode used to measure conductivity perpendicular to the plane of the film.

---

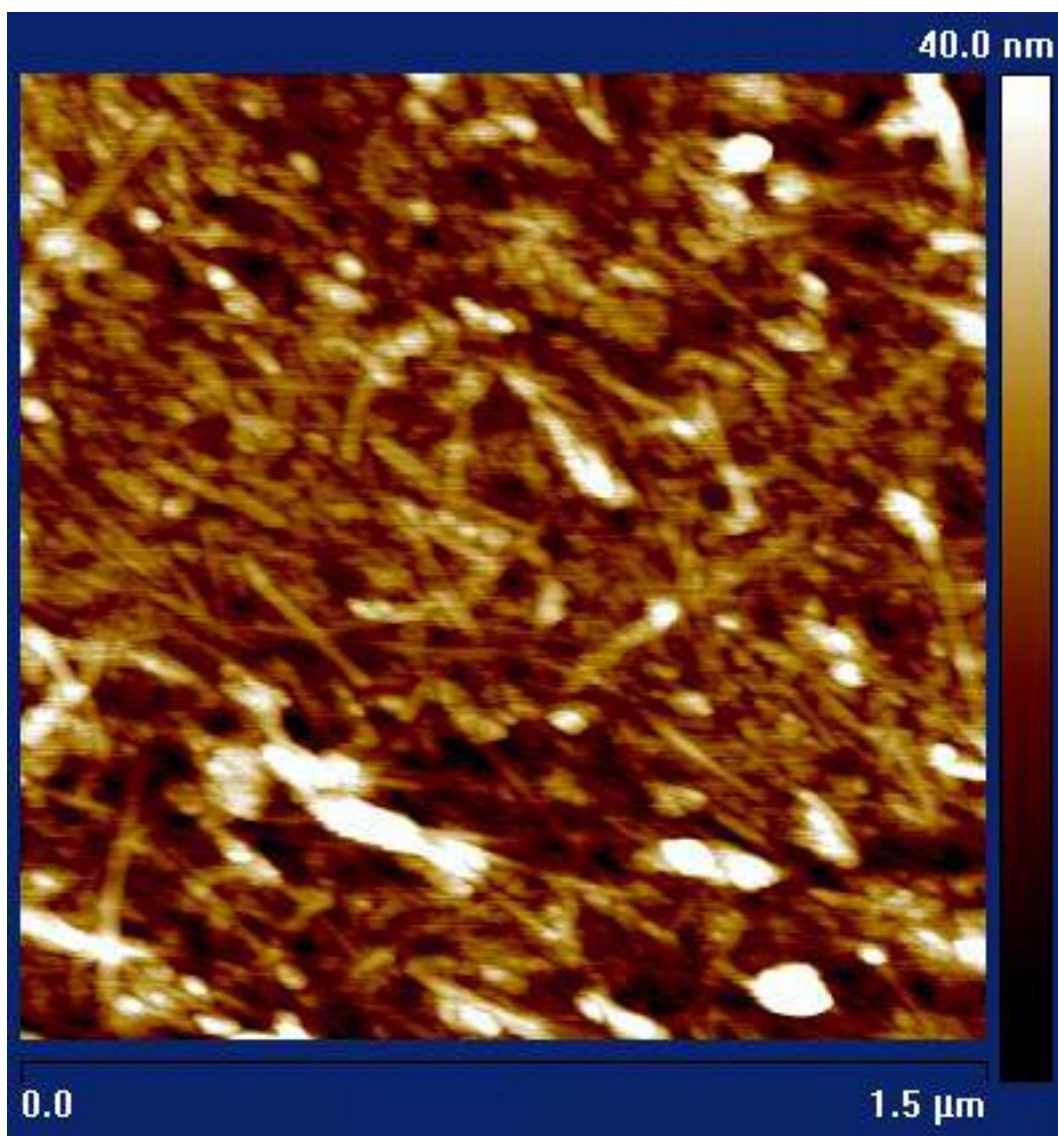

**Figure S-5.** AFM image of ribbons in the gap between platinum electrodes, in a ribbon/PDDA film grown layer-by-layer.

---
